# Supplementary material for: RNP components condense into repressive RNP granules in the aging brain
Source: PubMed Central journal article supplement (PMC9120078; doi:10.1038/s41467-022-30066-4), 2022-05-19
Supplement: 41467_2022_30066_MOESM1_ESM.pdf [file 41467_2022_30066_MOESM1_ESM.pdf]

Supplementary Information

**RNP components condense into repressive RNP granules in the aging brain**

**Pushpalatha et al.**

**Supplementary Figures 1-11**

**Supplementary Data 1-2**

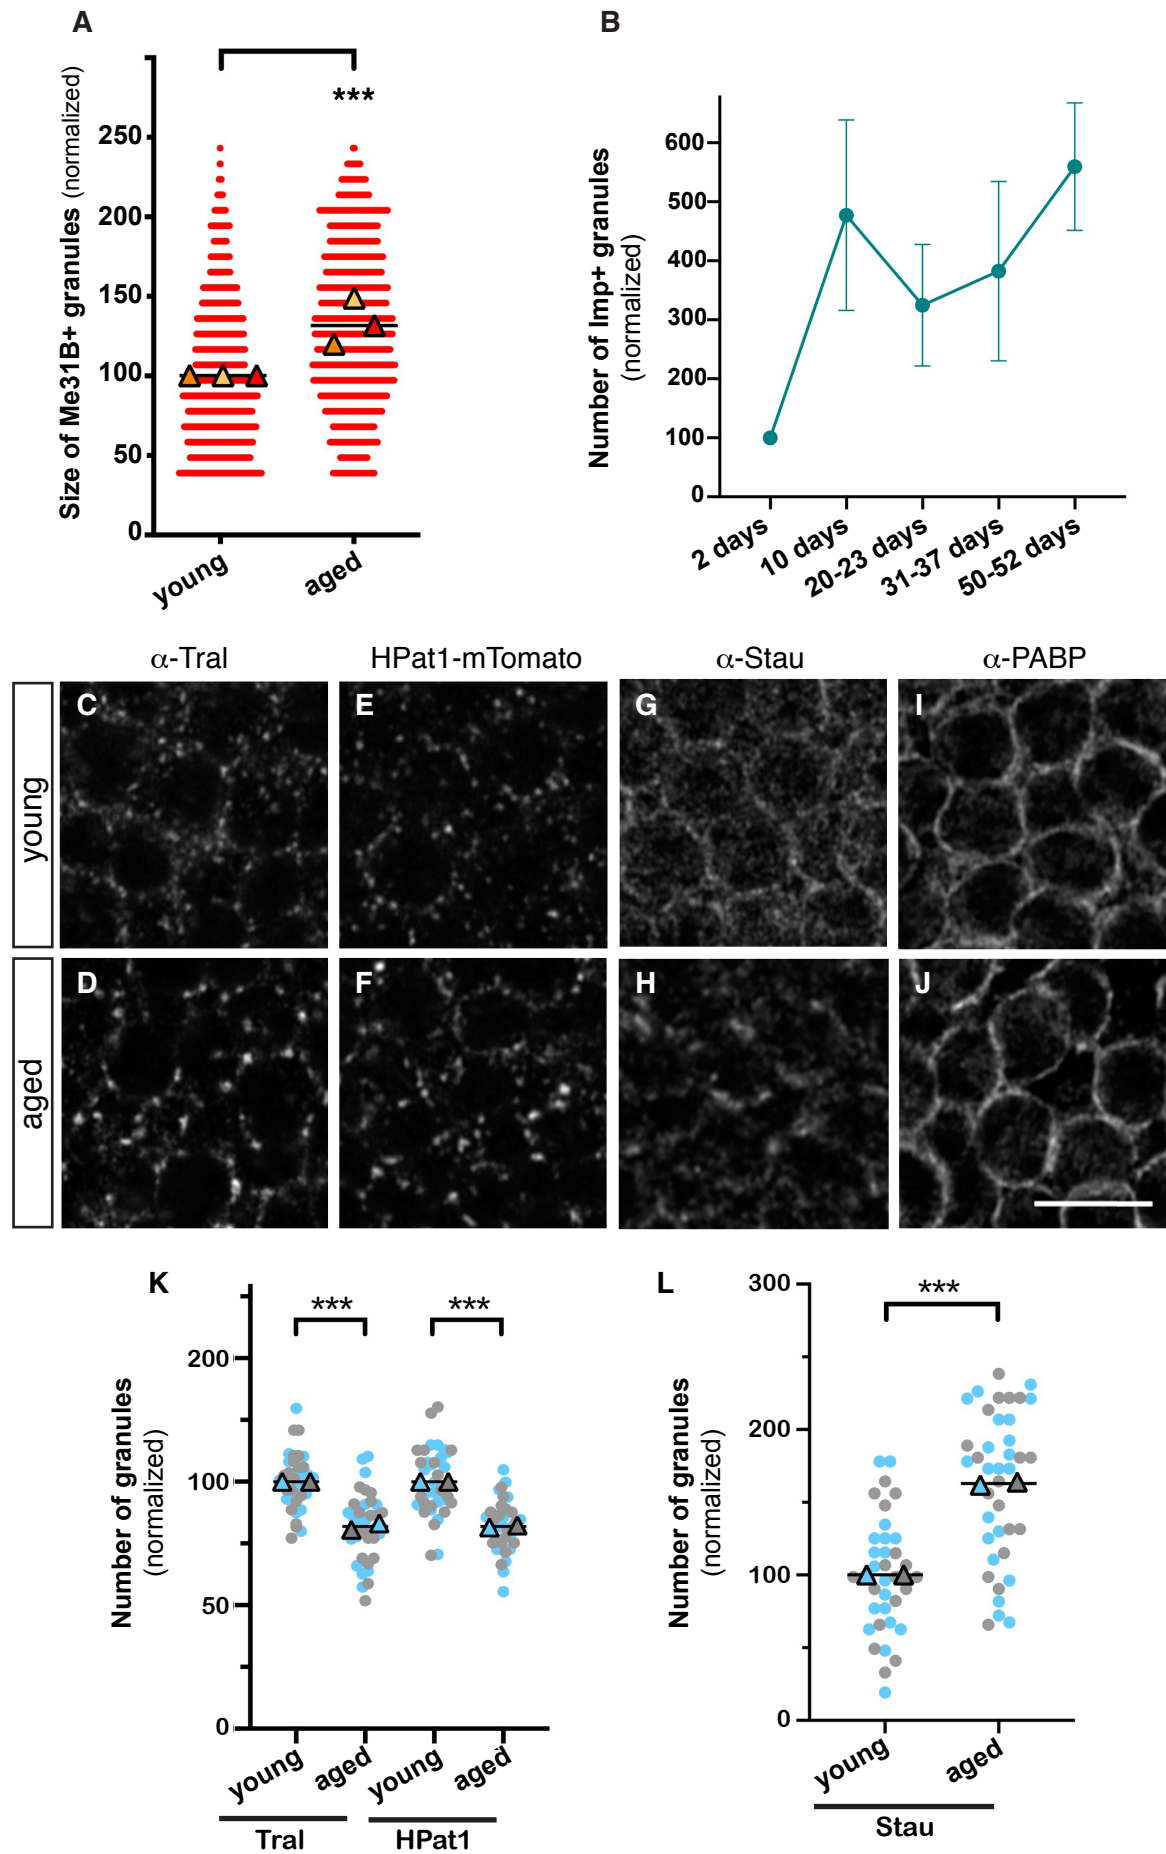

### **Supplementary Figure 1. Clustering of RNP granule components**

(A) Sizes of Me31B-positive granules in 1-2 day-old (young) and 37-38 day-old (aged) control brains. Values were normalized to the young condition. Three replicates were performed and the mean value of each replicate is indicated as a symbol (triangle). The distribution of granule sizes is shown for one replicate only. \*\*\*,  $P < 0.001$  (unpaired, two-sided t-test). (B) Mean number of Imp-containing granules upon gradual aging (per surface area, normalized to 1-2 days). Three replicates were performed per condition. At least 15 samples were analyzed per condition. Error bars represent s.e.m. (C-J) Cell bodies of MB  $\gamma$  neurons imaged from 1-2 day- (young; C,E,G,I), or 37-38 day- (aged; D,F,H,J) old brains. Brains were stained with anti-Tral (C,D), anti-Staufen (G,H) or anti-PABP (I,J) antibodies. Signal produced by a HPat1-mTomato knock-in line is shown in E,F. Scale bar: 5  $\mu\text{m}$ . (K-L) Numbers of granules containing Tral (K; left), HPat1 (K; right) or Staufen (L). Values were normalized to the young condition. Note that age-dependent condensation of Tral and HPat1 results in a decrease number of detected granules (similarly to what is observed with Me31B). Age-dependent condensation of Staufen, in contrast, leads to an increase in the number of granules that can be detected over the diffuse cytoplasmic signal (similarly to what is observed with Imp). Two replicates were performed and the mean value of each replicate is indicated as a symbol (triangle). At least 18 fields were imaged per condition. \*\*\*,  $P < 0.001$  (unpaired, two-sided t-tests). Source data are provided as a Source Data file.

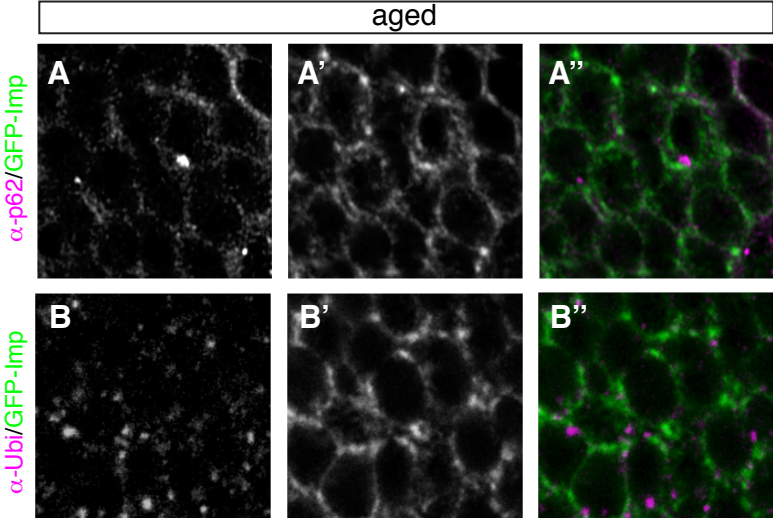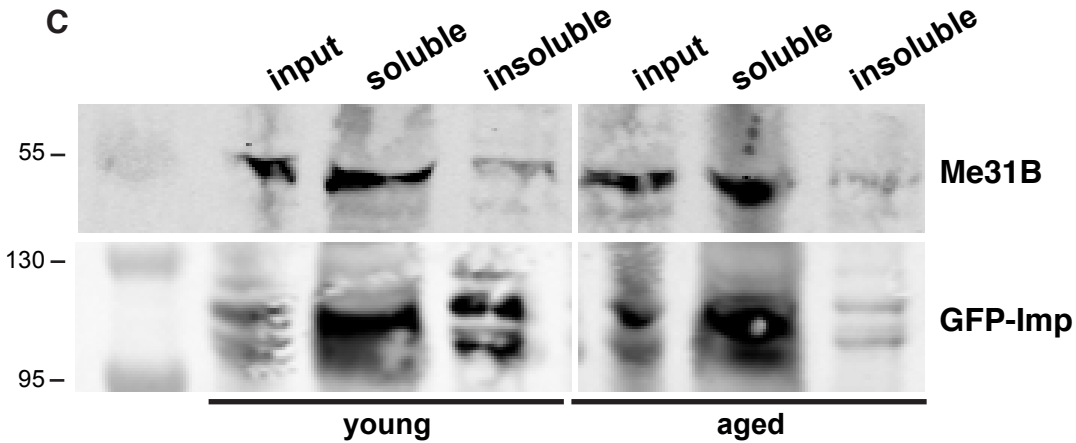



**Supplementary Figure 2. Imp and Me31B do not assemble into insoluble protein aggregates in aged brains.**

(A,B) Cell bodies of MB  $\gamma$  neurons imaged from 37-38 day-old (aged) brains. GFP-Imp-expressing brains were stained with anti-p62 (A, magenta in A'') or anti-Ubiquitin (B, magenta in B'') antibodies. GFP-Imp distribution is shown in white in A',B' and in green in A'',B''. Two independent replicates were performed. Scale bar: 5  $\mu$ m. (C) Western-Blot performed with soluble and insoluble fractions recovered from young and aged GFP-Imp-expressing brain lysates. No increase in the amount of GFP-Imp and Me31B proteins found in the insoluble fraction was observed upon aging. Two independent replicates were performed. Source data are provided as a Source Data file.

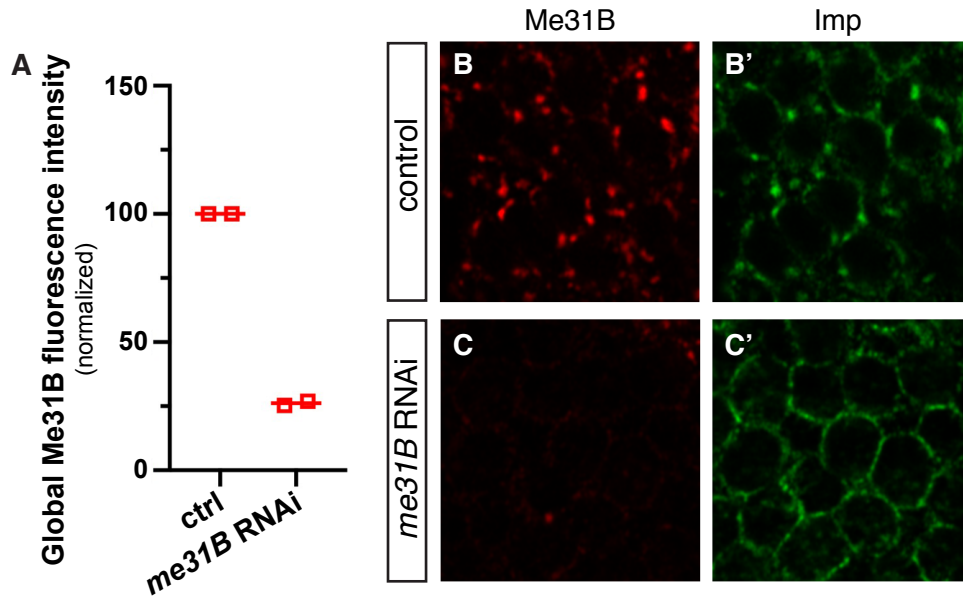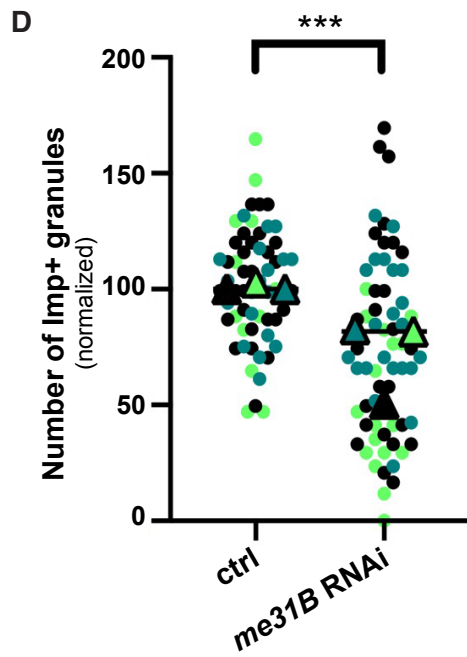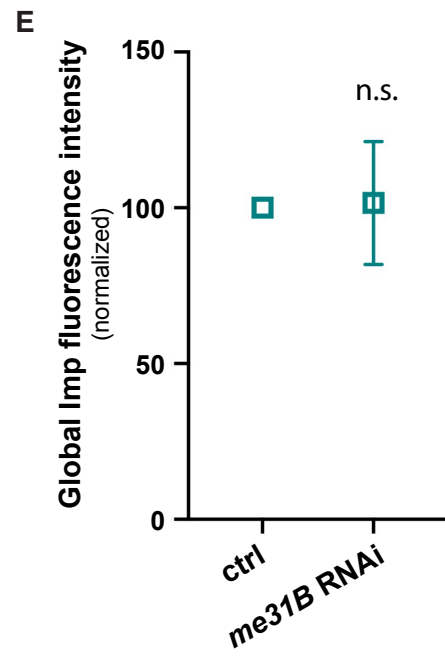

**Supplementary Figure 3. *me31B* is required for the recruitment of Imp to granules.**

(A) Relative total amount of Me31B in MB  $\gamma$  neurons from control and *me31B* RNAi brains. Data were normalized to the control values. Each data point represents the mean value obtained from one replicate. Two independent replicates were performed. (B,C) Cell bodies of 35-38 day-old GFP-Imp-expressing MB  $\gamma$  neurons stained with anti-Me31B (B,C) antibodies. GFP-Imp signals are shown in B',C'. Cell bodies shown in C,C' were subjected to *me31B* RNAi. Scale bar: 5  $\mu$ m. (D) Number of Imp+ granules (per surface area, normalized) in control and *me31B* RNAi aged brains. Three replicates were performed and the mean value of each replicate is indicated as a symbol (triangle). Data points were color-coded based on the experimental replicate they belong to. At least 12 fields were imaged per condition. \*\*\*,  $P < 0.001$  (unpaired, two-sided t-test). (E) Total amount of Imp in MB  $\gamma$  neurons from control and *me31B* RNAi brains. Data were normalized to the control values. Each data point represents the mean value obtained from four independent replicates. Error bars represent s.e.m. n.s. stands for not significant (unpaired, two-sided Mann-Whitney test on replicate means). Complete genotype: UAS-*me31B*-RNAi/tub-Gal80ts;OK107-Gal4/+. Source data are provided as a Source Data file.

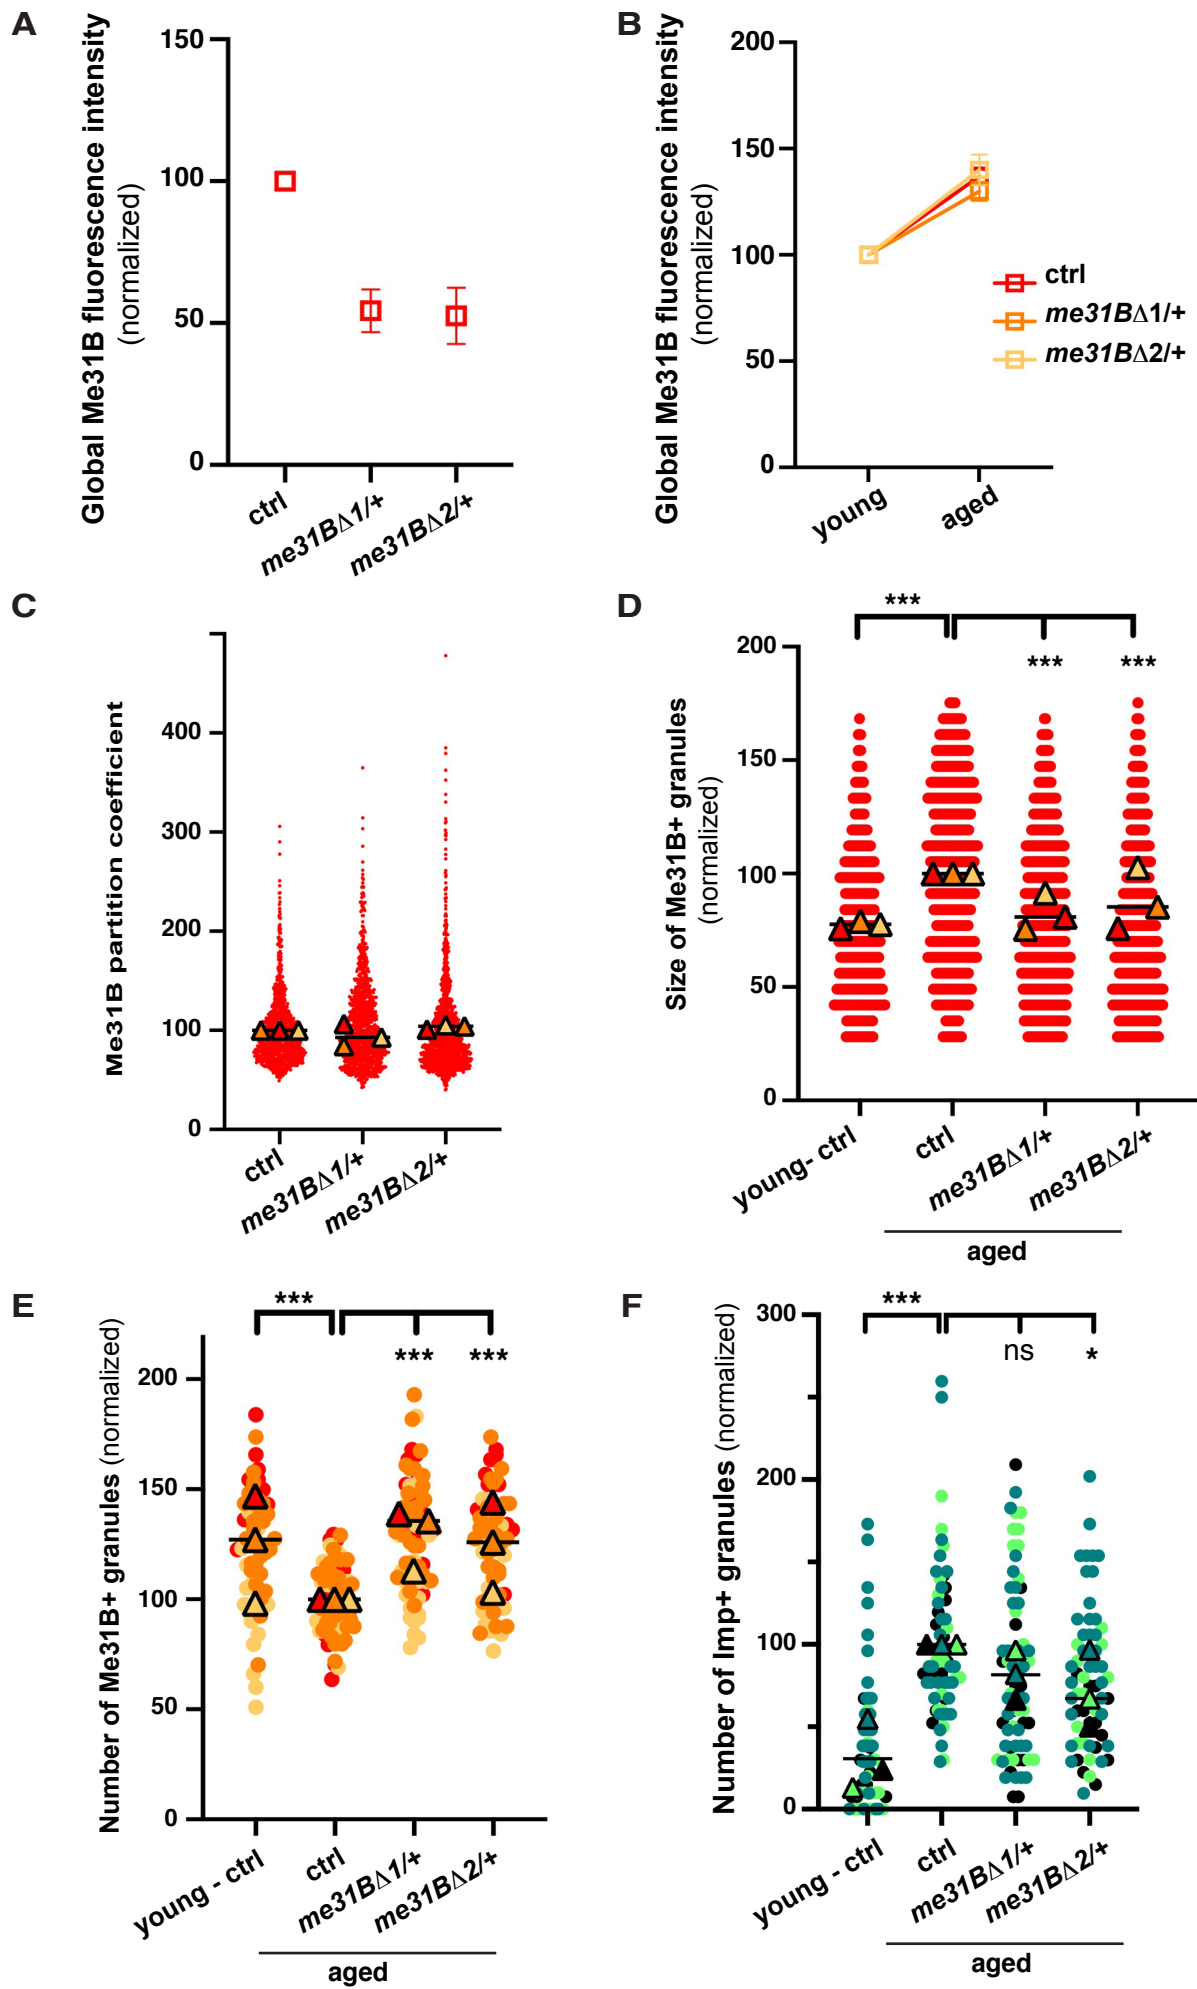

**Supplementary Figure 4. Me31B levels and granule properties in *me31BΔ/+* individuals.**

(A) Me31B-GFP levels measured from 35-38 day-old MB  $\gamma$  neurons. Values were normalized to the control condition. (B) Me31B-GFP levels measured from 1-2 day- (young) and 35-38 day- (aged) old MB  $\gamma$  neurons. Values were normalized to the young condition. In A,B, data points represent the mean values obtained from three independent replicates and error bars s.e.m. At least 12 fields were imaged per replicate and per condition. (C) Partition coefficient of Me31B-GFP in 37-38 day- (aged) old brains of controls and heterozygous (*me31BΔ1/+* or *me31BΔ2/+*) brains. Partition coefficients were estimated by dividing the maximal intensity of Me31B signal in individual RNP granules to the intensity of the cytoplasmic diffuse pool (see Methods), and calculated for each granule detected in the imaged fields. Three replicates were performed and the mean value of each is indicated as a triangle. The distribution of individual granule partition coefficients is shown for one replicate only. (D,E) Distribution of sizes (D) and number (E) of Me31B-containing granules in control (ctrl) and heterozygous (*me31BΔ1/+* or *me31BΔ2/+*) brains from 1-2 day- (young) or 37-40 day- (aged) old flies. Values were normalized to the aged control condition. In C-E, three replicates were performed and the mean value of each is indicated as a triangle. In C-D, the distribution of granule sizes is shown for one replicate only. In E, data points were color-coded based on the replicate they belong. At least 12 fields were imaged per replicate. \*\*\*,  $P < 0.001$  (one-way ANOVA test with Sidak's multiple comparison tests, performed on individual data points). (F) Numbers of Imp-containing granules (per surface area; normalized to aged controls). Three replicates were performed and the mean value of each is indicated as a triangle. Data points were color-coded based on the replicate they belong to. At least 10 fields were imaged per condition. \*,  $P < 0.05$ ; \*\*\*,  $P < 0.001$  (one-way ANOVA test with Sidak's multiple comparison tests). n.s. stands for not significant.  $P = 0.03$  for *me31BΔ2/+* and 0.08 for *me31BΔ1/+*. Source data are provided as a Source Data file.

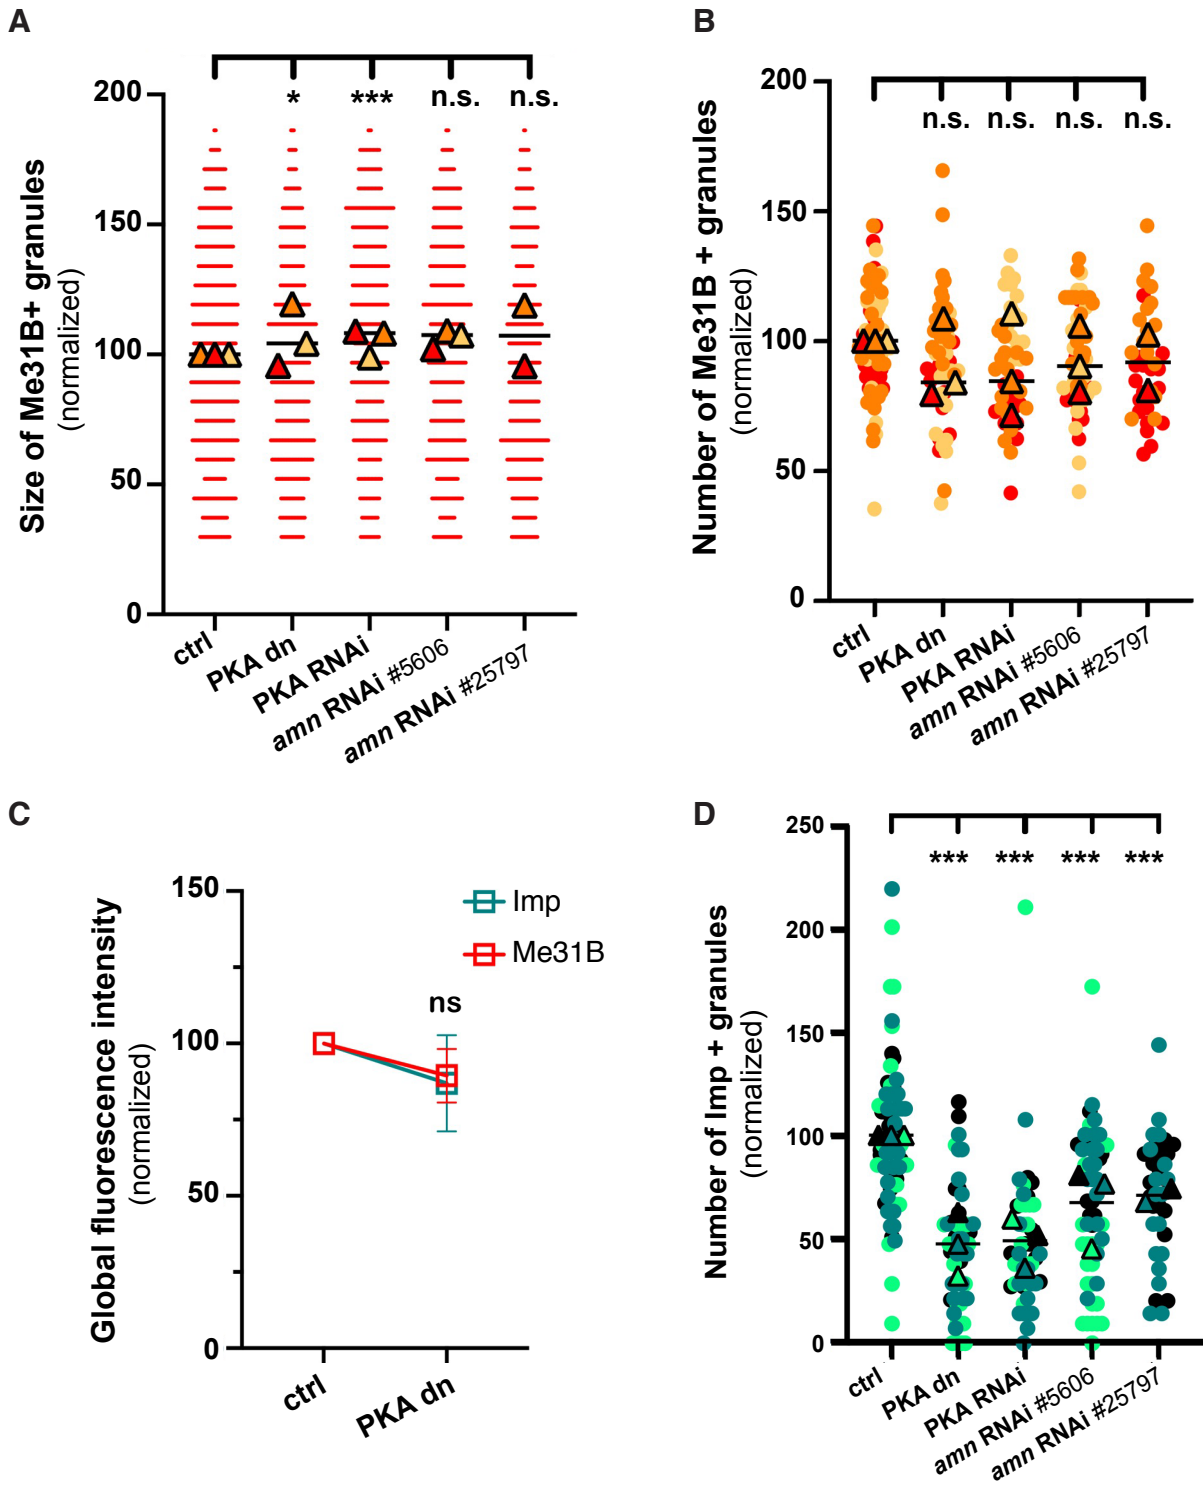

**Supplementary Figure 5. PKA inactivation does not significantly affect Me31B condensation.**

Distribution of sizes (A) and number (B) of Me31B-containing granules in 30 day-old (aged) control brains and brains with reduced PKA activity. Values were normalized to the control condition. Three replicates were performed and the mean value of each replicate is indicated as a symbol (triangle). In A, the distribution of granule sizes is shown for one replicate only. In B, data points were color-coded based on the experimental replicate they belong. \*,  $P < 0.05$ ; \*\*\*,  $P < 0.001$  (one-way ANOVA test with Sidak's multiple comparison tests, performed on individual data points). n.s. stands for not significant. In A,  $P = 0.04$  for PKA d.n.,  $< 0.001$  for *PKA* RNAi, 0.4 for *amn* RNAi #5606 and 0.052 for *amn* RNAi #25797. In B,  $P = 0.12$  for PKA d.n., 0.048 for *PKA* RNAi, 0.4 for *amn* RNAi #5606 and 0.18 for *amn* RNAi #25797. (C) Total GFP-Imp and Me31B-GFP levels measured from confocal images of 37-40 day-old MB  $\gamma$  neurons. Data point represents the mean value obtained from three to four independent replicates and error bars s.e.m. Values were normalized to the control condition. At least 12 fields were imaged per replicate and per condition. n.s. stands for not significant (unpaired, two-sided Mann-Whitney test). (D) Normalized numbers of Imp-containing granules (per surface area) in 30 day-old (aged) control brains (left) and brains with reduced PKA activity. PKA dn stands for PKA dominant negative and corresponds to expression of a kinase dead variant. At least 10 fields were imaged per condition. Three replicates were performed and the mean value of each replicate is indicated as a symbol (triangle). Data points were color-coded based on the experimental replicate they belong to. \*\*\*,  $P < 0.001$  (one-way ANOVA test with Sidak's multiple comparison tests). Source data are provided as a Source Data file.

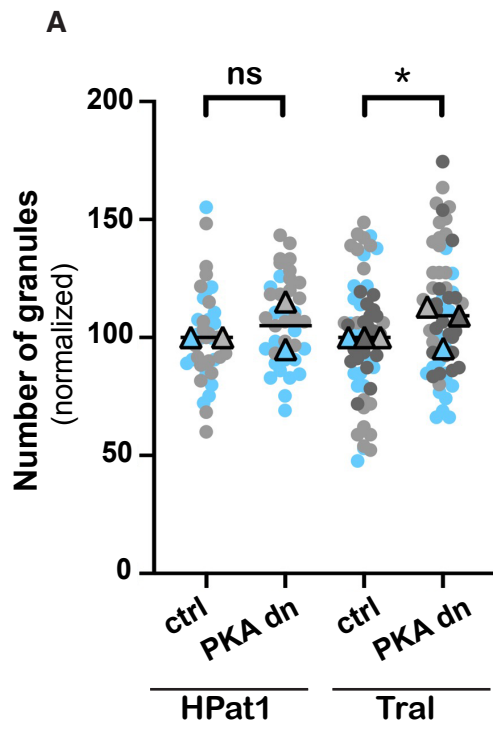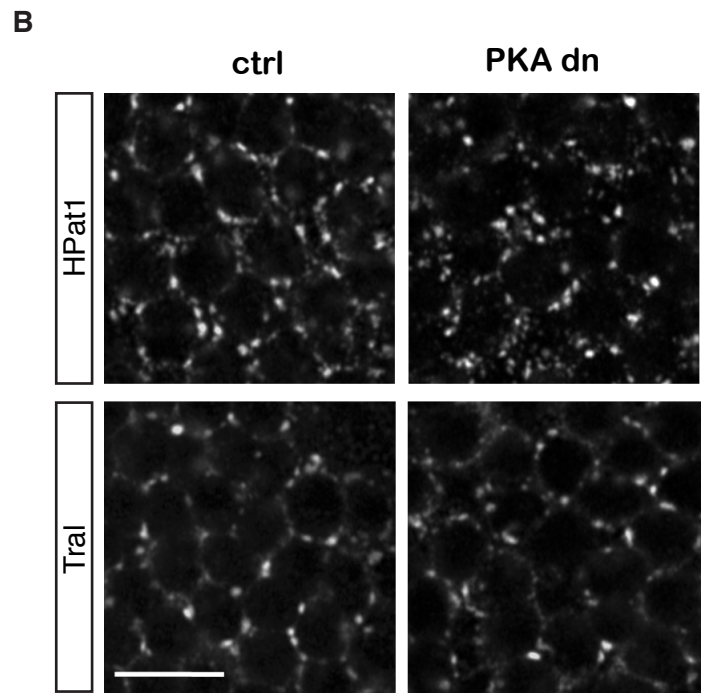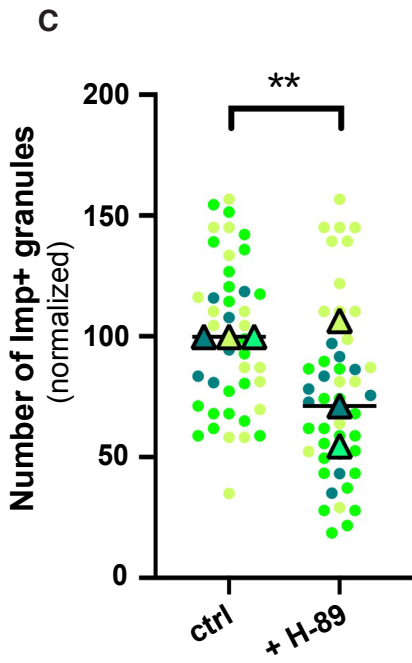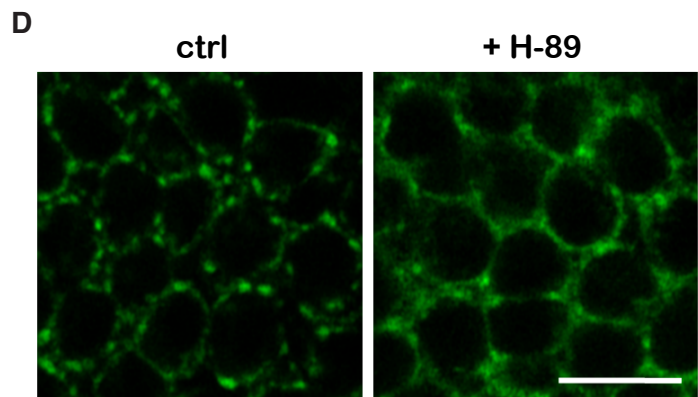



**Supplementary Figure 6. PKA promotes Imp condensation acutely, and specifically.**

(A) Number of granules (per surface area) containing HPat1 (left) or Tral (right) upon inhibition of PKA in 30 day-old (aged) brains. Values were normalized to controls. Two to three replicates were performed and the mean value of each replicate is indicated as a symbol (triangle). Data points were color-coded based on the experimental replicate they belong to. At least 20 fields were imaged per condition. \*,  $P < 0.05$  (unpaired, two-sided t-test). n.s. stands for not significant.  $P = 0.11$  for HPat1 and 0.02 for Tral. (B) Cell bodies of 30 day-old MB  $\gamma$  neurons expressing (right) or not (left) a PKA kinase dead variant using tub-Gal80ts; OK107-Gal4. Samples were stained with anti-HPat1 (upper panel) or anti-Tral (lower panel) antibodies. Scale bar: 5  $\mu\text{m}$ . (C) Numbers of Imp-containing granules (per surface area) in control (left) and H-89-treated (right) brains of 35-38 day-old flies. Values were normalized to the control condition. Three replicates were performed and the mean value of each replicate is indicated as a symbol (triangle). Data points were color-coded based on the experimental replicate they belong to. At least 6 fields were imaged per condition. \*\*,  $P < 0.01$  (unpaired, two-sided t-test).  $P = 0.002$ . (D) Cell bodies of 37-38 day-old MB  $\gamma$  neurons expressing endogenous GFP-Imp (green) and treated (right), or not (left), with the PKA inhibitor H-89. Scale bar: 5  $\mu\text{m}$ . Source data are provided as a Source Data file.

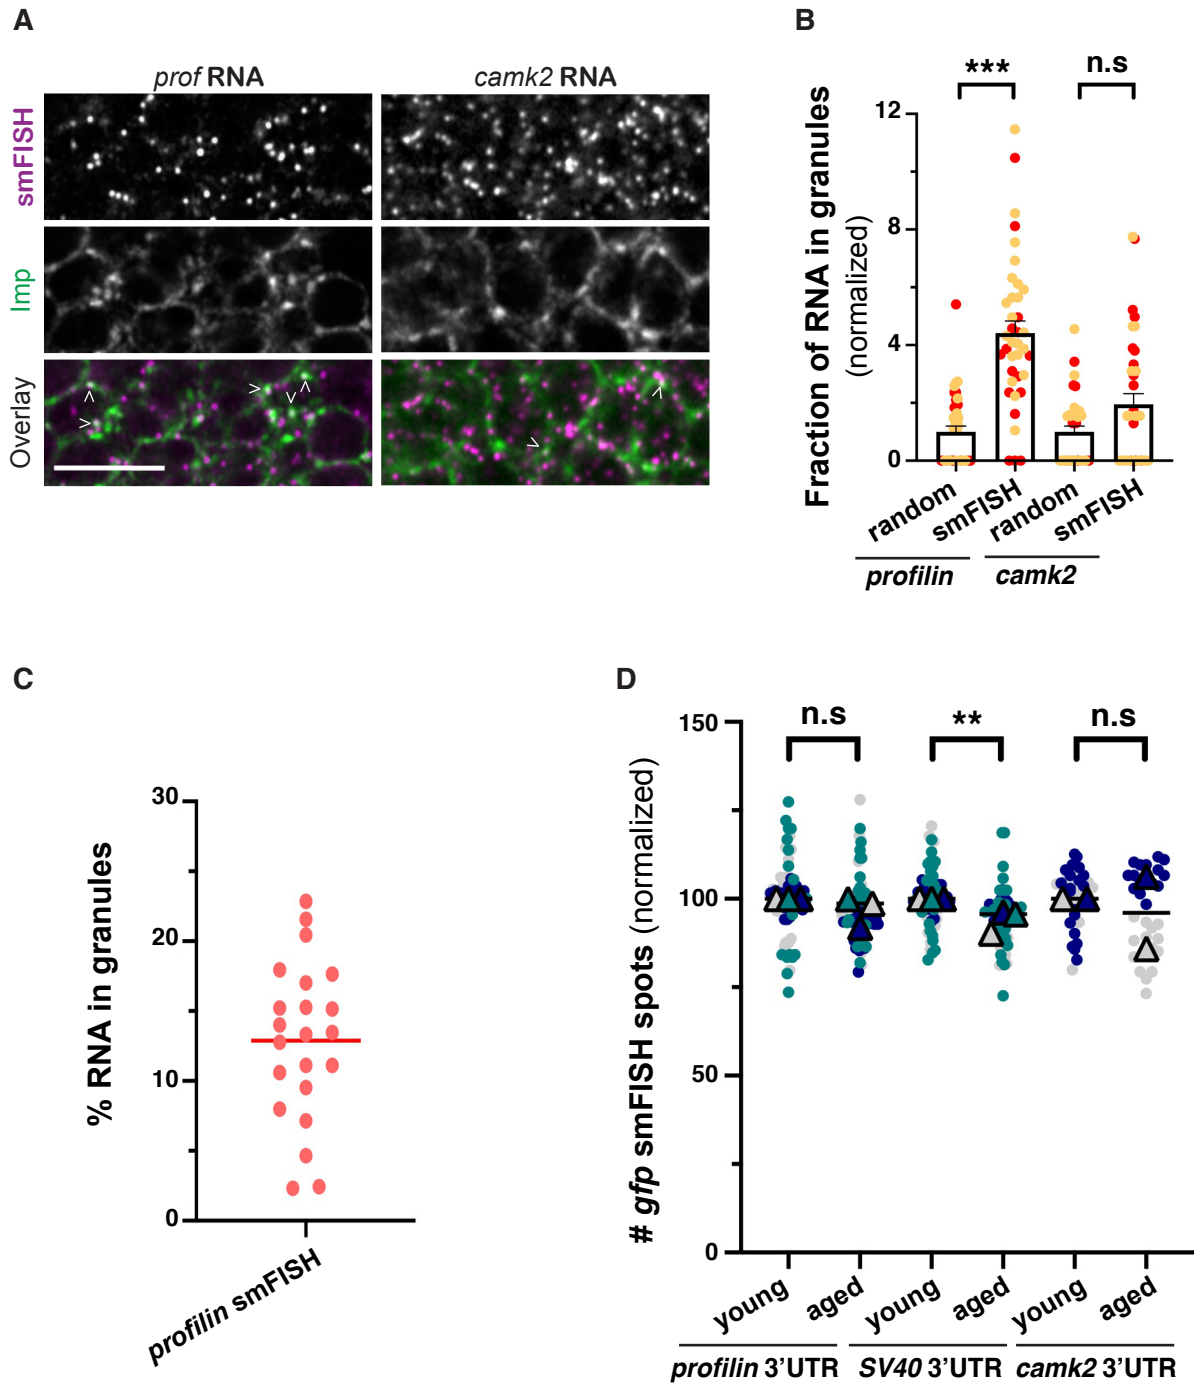

**Supplementary Figure 7. Association of *profilin* RNA with granules and levels of *gfp-profilin*-3'UTR transcripts.**

(A) Cell bodies of GFP-Imp-expressing MB  $\gamma$  neurons from aged brains. *profilin* (left) and *camk2* (right) smFISH signals are shown in white (upper panel) and magenta (overlay; lower panel). GFP-Imp signals are shown in white in the middle panel and green in the overlay. Arrowheads point to *profilin* RNA co-localizing with granules. Scale bar: 5  $\mu$ m. (B) Relative fractions of RNA molecules found in granules. The fraction of smFISH spots co-localizing with Imp+ granules was estimated for each imaged field using the JACoP plugin of Fiji (see Method). Values were normalized to their respective random control, in which non-specific levels of colocalization were assessed after rotating smFISH images by 90°. Two replicates were performed. Data points were color-coded based on the experimental replicate they belong to. Main bars correspond to mean values and error bars to s.e.m. \*\*\*,  $P < 0.001$  (Kruskall-Wallis test with Dunn's post-test). n.s. stands for not-significant ( $P = 0.2$ ).  $n = 38$  for *profilin* mRNA and 36 for *camk2* mRNA. (C) Manually estimated percentages of *profilin* smFISH spots co-localizing with Me31B-GFP granules in aged brains. Percentages were estimated on individual imaged fields ( $n = 23$ ). (D) Number of *gfp* smFISH spots (per surface area) in 1-2 day- (young) and 37-40 day- (aged) old brains expressing EGFP-*profilin* (left), *SV40* (middle) or *camk2* (right) 3'UTR reporters. Values were normalized to the young condition for each reporter. Three replicates were performed and the mean value of each is indicated as a triangle. Data points were color-coded based on the replicate they belong to. At least 12 fields were imaged per condition. \*\*,  $P < 0.01$  (one-way ANOVA test with Sidak's multiple comparison tests). n.s. stands for not significant.  $P = 0.07$  for *profilin* reporter, 0.007 for *SV40* and 0.36 for *camk2*. Source data are provided as a Source Data file.

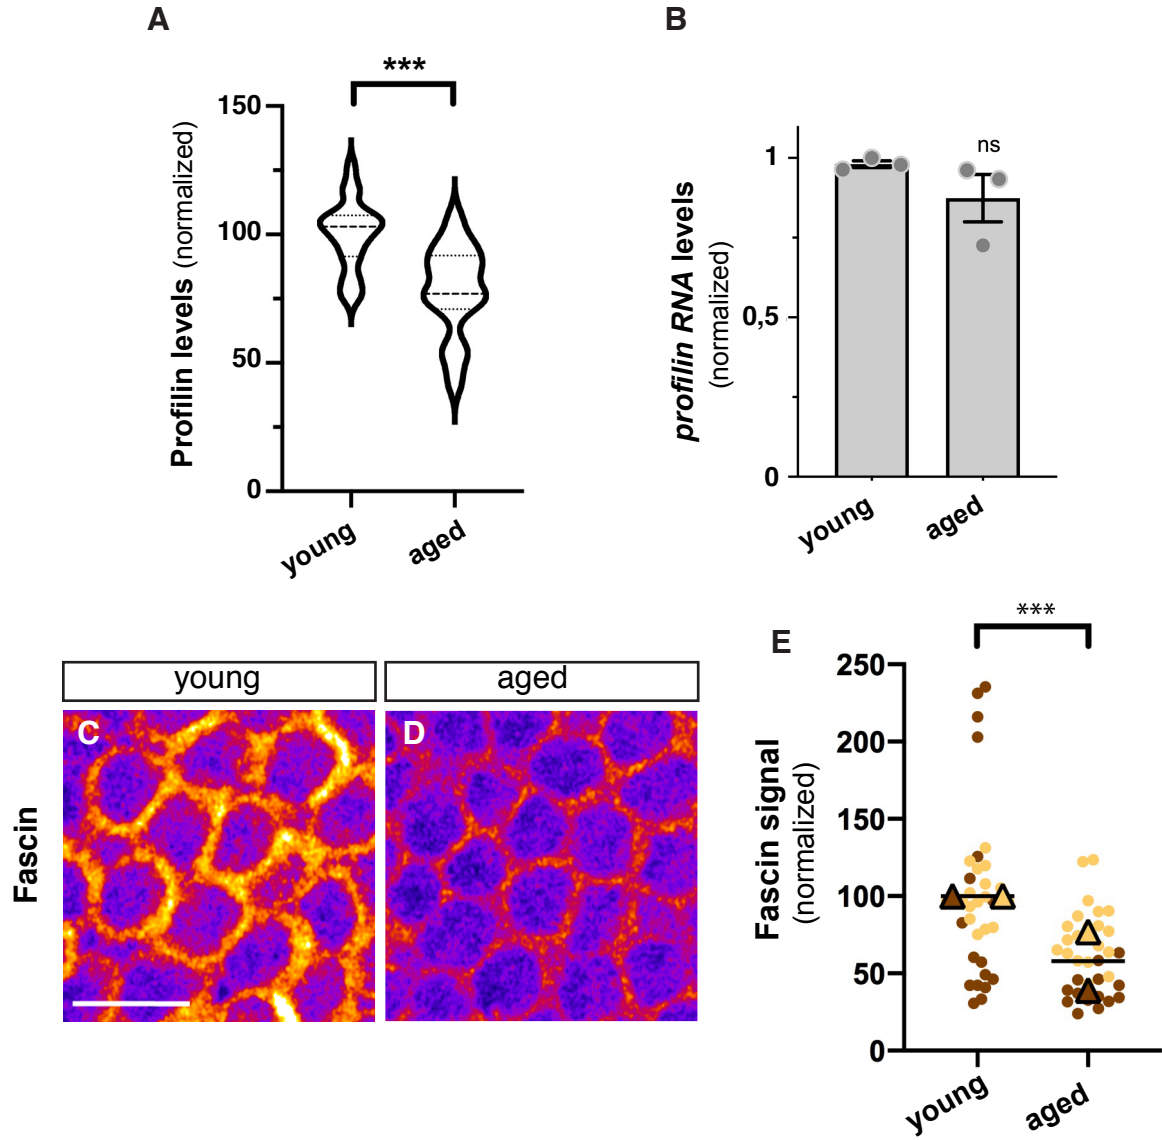

**Supplementary Figure 8. Expression of endogenous *profilin* and organization of the F-actin cytoskeleton upon aging.**

(A) Normalized Profilin protein levels measured after immunostaining on 1-2 day (young) or 37-38 (aged) day-old brains. \*\*\*,  $P < 0.001$  (unpaired, two-sided Mann Whitney test). (B) Endogenous *profilin* RNA levels. RNA levels were quantified by quantitative RT-PCR and normalized to those of *rp49* and *rpl7*. n.s. stands for not significant (unpaired, two-sided Mann-Whitney test;  $n=3$ ;  $P=0.4$ ). Error bars correspond to s.e.m (biological replicates). (C,D) Cell bodies of 1-2 day- (young) and 35-38 day- (aged) old MB  $\gamma$  neurons expressing a mcherry-Fascin fusion protein under the control of the OK107-Gal4 driver. (E) Distribution of Fascin signal intensities. Values were normalized to the young condition. Two replicates were performed and the mean value of each replicate is indicated as a symbol (triangle). Data points were color-coded based on the experimental replicate they belong to. At least 14 fields were imaged per condition. \*\*\*,  $P < 0.001$  (unpaired, two-sided t-test on individual data points). Complete genotype: UAS-RFP-Fascin/+;OK107-Gal4/+. Source data are provided as a Source Data file.

A

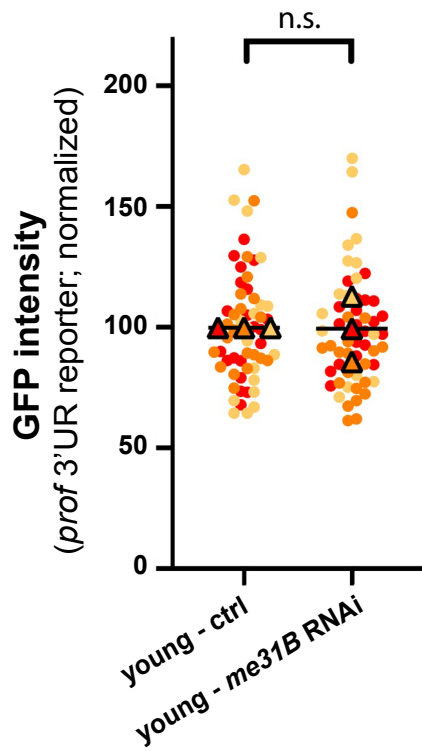

B

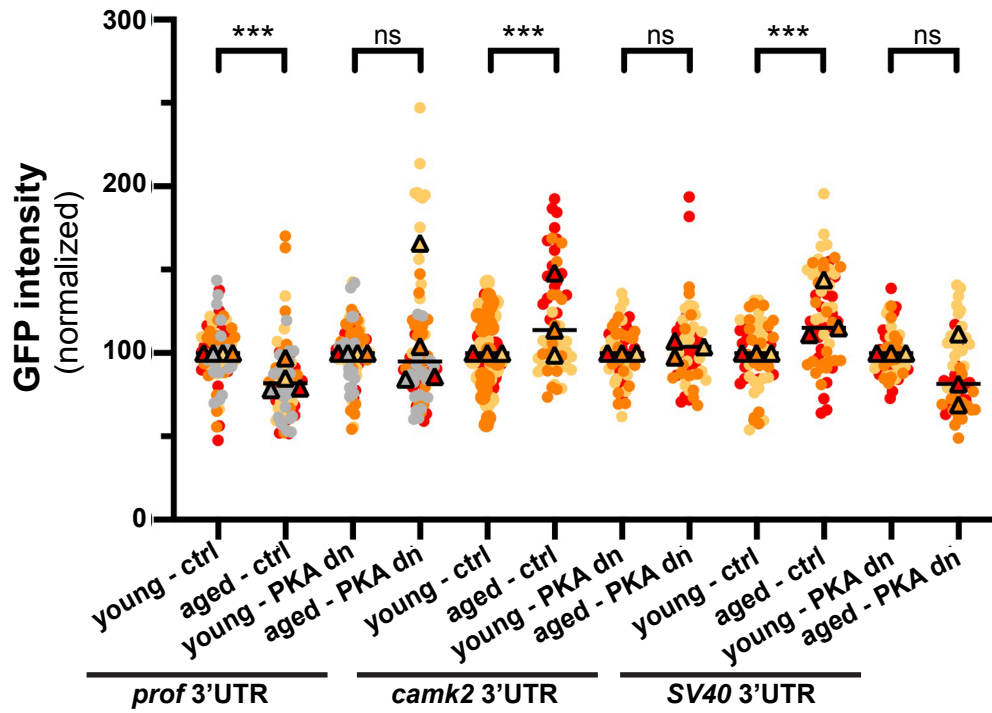

**Supplementary Figure 9. Impact of *me31B* RNAi and PKA inhibition on RNA translation.**

(A) GFP signal intensities measured from 1-2 day-old brains expressing EGFP-*profilin* 3'UTR together with a *me31B* RNAi construct (right). n.s. stands for not significant (unpaired, two-sided t-test). (B) GFP signal intensities measured from 1-2 day- (young) and 37-38 day- (aged) old brains expressing EGFP-*profilin* 3'UTR (left), EGFP-*camk2* 3'UTR (middle) or EGFP-*SV40* 3'UTR (right) together with a PKA dominant negative construct (PKA dn). Note that in these experiments, reporter and PKA dn constructs were expressed constitutively using the OK107-Gal4. Values were normalized to the young conditions. In A, B, three to four replicates were performed and the mean value of each replicate is indicated as a symbol (triangle). Data points were color-coded based on the experimental replicate they belong to. At least 12 fields were imaged per condition. \*\*\*,  $P < 0.001$  (one-way ANOVA test with Sidak's multiple comparison tests). n.s. stands for not significant.  $P=0.33$  for *profilin* and PKA d.n., 0.96 for *camk2* and PKA d.n., 0.09 for *SV40* and PKA d.n. and  $<0.001$  for all other comparisons. Source data are provided as a Source Data file.

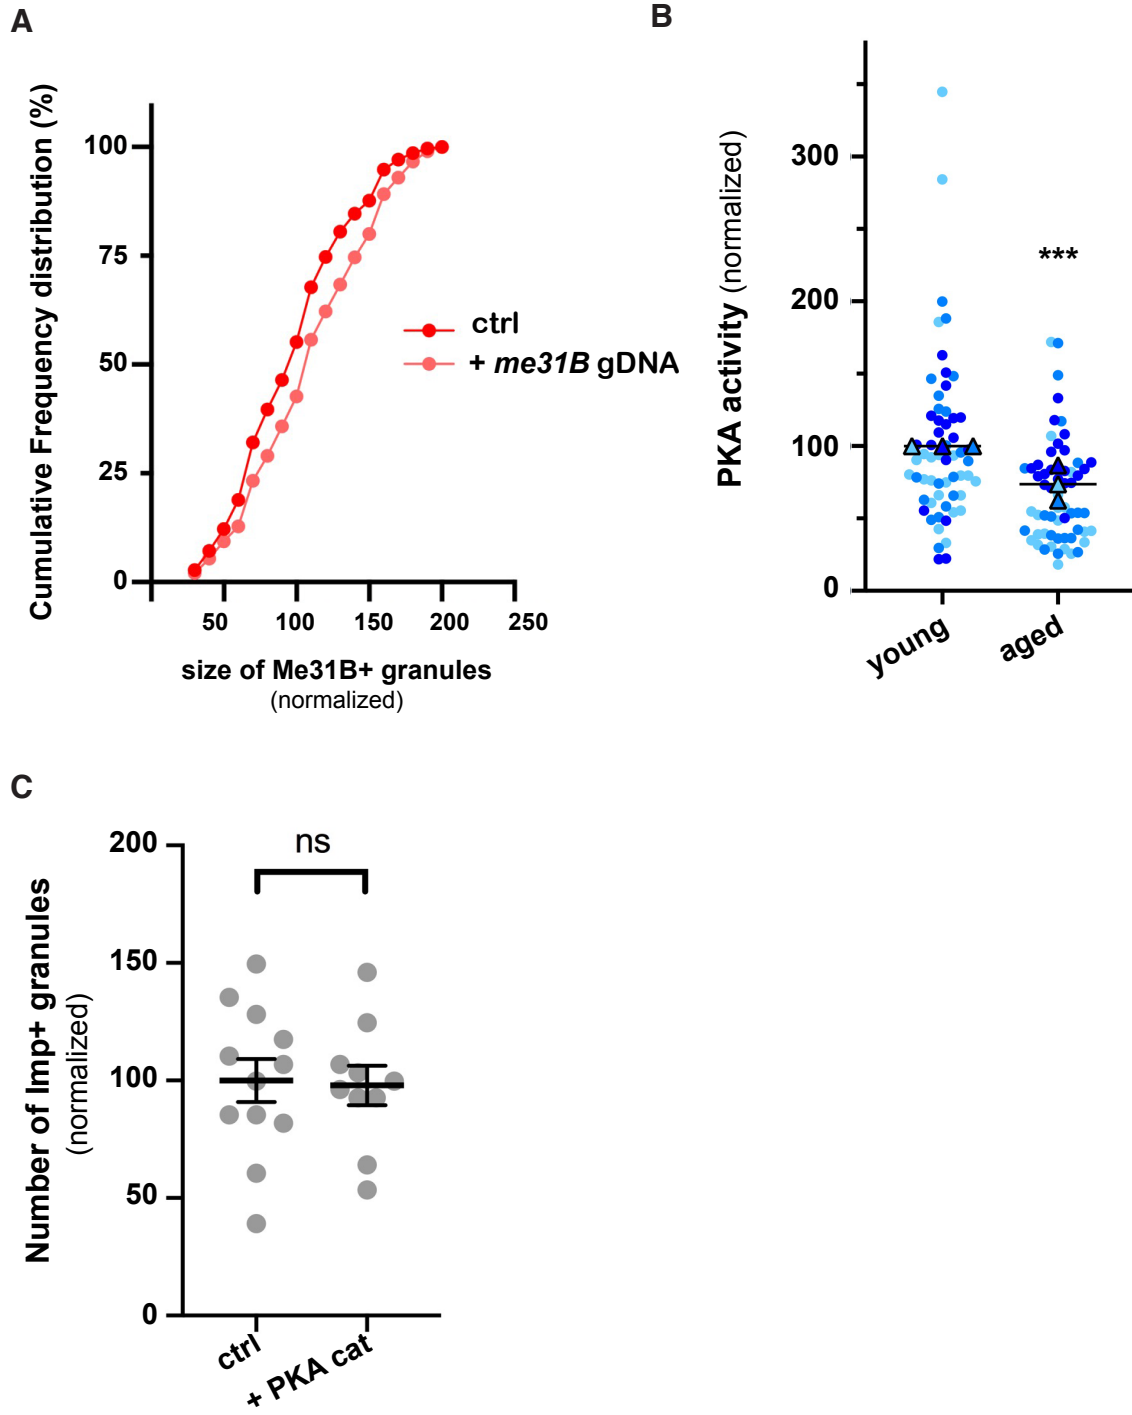



### Supplementary Figure 10. Modulation of Me31B levels and of PKA activity in young flies

(A) Sizes of Me31B-containing granules in MB  $\gamma$  neurons of 1-2 day- (young) containing an additional copy of *me31B* (+ *me31B* gDNA). Values were normalized to the control condition. No significant difference could be observed when comparing to control (ctrl) flies (unpaired t-test). (B) PKA activity in MB  $\gamma$  neurons of 1-2 day- (young) and 35-38 day- (aged) flies. PKA activity was measured using the GFP-PKA-SPARK reporter, by calculating the fraction of GFP proteins found in condensates in the cell bodies of MB neurons. Values were normalized to the young condition. Three replicates were performed and the mean value of each replicate is indicated as a symbol (triangle). Data points were color-coded based on the experimental replicate they belong to. At least 16 fields were imaged per condition. One outlier data point was omitted from the graph (but was considered to calculate the mean of the corresponding replicate and to perform statistical tests). \*\*\*,  $P < 0.001$  (unpaired, two-sided t-test). Complete genotype: UAS-GFP-PKA-SPARK/+;OK107-Gal4/+. (C) Number of Imp-containing granules (per surface area, normalized) in 1-2 day-old flies over-expressing the catalytic subunit of PKA (PKA-C1, indicated as PKA cat). Means and s.e.m are indicated as black lines. No significant difference could be observed when comparing to control (ctrl) flies (unpaired, two-sided t-test;  $n=12$  for controls and 10 for PKA cat;  $P=0.87$ ). Complete genotype: UAS-PKA-C1/+; OK107-Gal4/+. One replicate was performed. Source data are provided as a Source Data file.

**A**

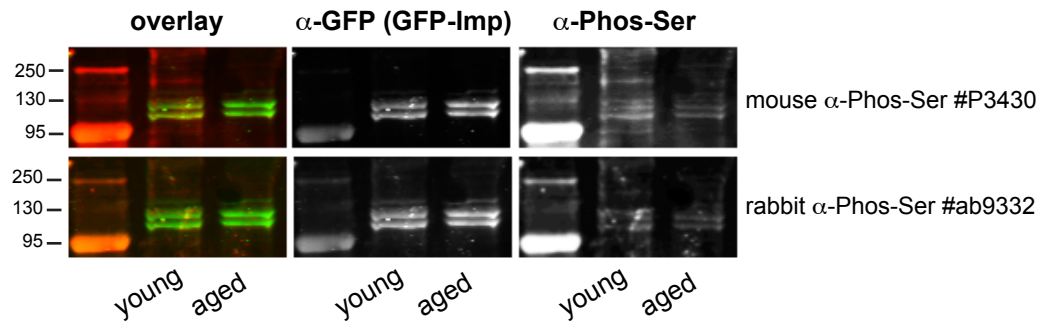

**B**

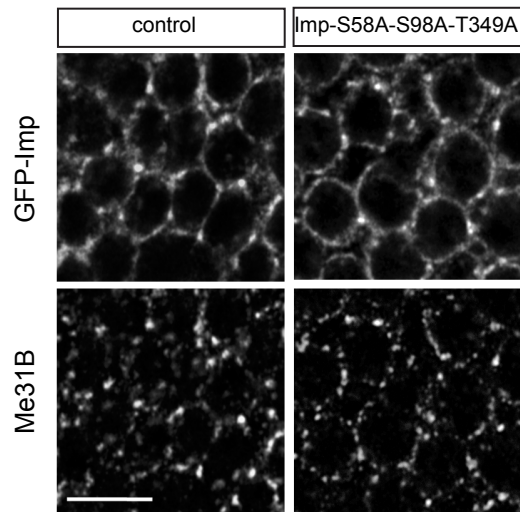

**Supplementary Figure 11. Imp is phosphorylated on Serines, but the S58A, S98A and T349A putative PKA phosphorylation sites are dispensable for Imp condensation.**

(A) Western-Blot performed on fractions recovered after immuno-precipitation of GFP-Imp proteins from head lysates. Lysates were prepared from 1-2 day-old (young) or 37-40 day- (aged) old flies. Two different anti-phos-Ser antibodies were used for the Western-Blot: a mouse anti-Phos-Ser (Sigma #P3430; upper panel) and a rabbit anti-Phos-Ser (Abcam #ab9332; lower panel). Both revealed bands co-localizing with the GFP-Imp ones. Two independent replicates were performed. (B) Cell bodies of MB  $\gamma$  neurons from 37-40 day-old control GFP-Imp (left) and mutant GFP-Imp-S58A-S98A-T349A (right) brains stained with anti-Me31B antibodies. Imp condensed to a similar degree in both conditions. Two independent replicates were performed. Scale bar: 5  $\mu$ m. Source data are provided as a Source Data file.

| <b>Supplementary Data 1. List of lines tested in the selective screen for modifiers of Imp condensation</b> |                               |                             |                        |                   |                                                         |
|-------------------------------------------------------------------------------------------------------------|-------------------------------|-----------------------------|------------------------|-------------------|---------------------------------------------------------|
| <b>Pathway</b>                                                                                              | <b>Gene</b>                   | <b>Construct</b>            | <b>Stock reference</b> | <b>Source</b>     | <b>Modification of Imp condensation in aged flies ?</b> |
| <b>ROS</b>                                                                                                  | Sod1                          | UAS-Sod1.RNAi               | 24491                  | BDSC              | no                                                      |
|                                                                                                             |                               | UAS-Sod1                    | 33605                  | BDSC              | no                                                      |
|                                                                                                             |                               | UAS-Sod1 RNAi               | 36804                  | BDSC              | no                                                      |
|                                                                                                             |                               | UAS-Sod2 RNAi               | 25969                  | BDSC              | no                                                      |
|                                                                                                             | Sod and catalase              | UAS cat/cyo; UAS sod/tm     |                        | Bolan<br>Laura    | no                                                      |
|                                                                                                             | Catalase                      | UAS-Cat.A                   | 24621                  |                   | no                                                      |
| <b>chaperones</b>                                                                                           | hsp 22                        | UAS hsp22 RNAi (GD)         | v43632                 | VDRC              | no                                                      |
|                                                                                                             |                               | UAS hsp22                   | 20055                  | BDSC              | no                                                      |
|                                                                                                             | Hsc70                         | UAS_Hsc70wt                 | 5846                   | BDSC              | no                                                      |
|                                                                                                             | Atg1                          | yw,hsflp;UASatg1            |                        | Neufeld<br>Thomas | no                                                      |
| <b>Insulin pathway</b>                                                                                      | InR                           | UAS InR DN                  | 8251                   | BDSC              | no                                                      |
|                                                                                                             |                               | UAS InR CA                  | 8263                   | BDSC              | no                                                      |
| <b>Aging-related genes</b>                                                                                  | sirt2                         | UAS sirt2 RNAi              | 31613                  | BDSC              | no                                                      |
|                                                                                                             | sirt1                         | UAS sirt1 RNAi              | 53697                  | BDSC              | no                                                      |
|                                                                                                             |                               | UAS sirt1 (low expression)  | 44217                  | BDSC              | no                                                      |
|                                                                                                             |                               | UAS sirt1 (high expression) | 44216                  | BDSC              | no                                                      |
|                                                                                                             | Methuselah                    | UAS mth                     | 64194                  | BDSC              | no                                                      |
|                                                                                                             |                               | mth mutant                  | 27896                  | BDSC              | no                                                      |
|                                                                                                             |                               | mth RNAi                    | 27495                  | BDSC              | no                                                      |
|                                                                                                             |                               | mth RNAi                    | 67829                  | BDSC              | no                                                      |
|                                                                                                             | Methyl transferase            | UAS Mettl3 RNAi             | 41590                  | BDSC              | no                                                      |
|                                                                                                             | <b>Mitochondrial function</b> | surf1                       | UAS surf1 RNAi         | 51783             | BDSC                                                    |
| UAS surf1 RNAi                                                                                              |                               |                             | 51783                  | BDSC              | no                                                      |
| TFAM                                                                                                        |                               | UAS TFAM RNAi               | 26744                  | BDSC              | no                                                      |
|                                                                                                             |                               | UAS TFAM RNAi               | 57742                  | BDSC              | no                                                      |
| dj1-β                                                                                                       |                               | UAS dj1-β                   | 33604                  | BDSC              | no                                                      |

**Supplementary Data 2. Sequences of the probe sets used to detect *profilin*, *egfp* and *camk2* mRNAs.**

From 5' to 3':

***profilin*:** ccgcaacaccgacgatt, cacacgaaattggcaggg, tcgcactttcgtttcggg, ttgctftaccgcacggcg, gatctggatatg  
gatcgc, ggggtgcggattaagtga, catggtgctttgtttgc, gtccacataatcttgcca, ctgcgagggccaggagtg, gatgcacgccttgg  
cac, ccaaatgttgccgtcgtg, tcacctcaaagccactgg, gtttgagagctcctctt, ctggtaaaagccgctgat, gttgctggtgagaccgtc  
, aatgtaccgctggccgg, gcggtctgtgccgaaag, ttcatgcagtgcactccg, acgatcacggcttgtgtt, cgggatcctcgtagatgg,  
tctctaccaggaagcgg, ctattctctagtagccg, tcattacggttcgctct, tggttttcttttcccat, gcaaattctttctggcc, tcctctgt  
acacacaaa, gcatttttactgatcca

***gfp*:** tctcgccttctgctacat, atgggcaccaccccggtgaa, gtcgccgtccagctcgacca, cgctgaactgtggccggtt,  
tcgccctcgcctcgcggga, ggtcagcttgccgtaggtgg, cggtggtgcagatgaacttc, ggccagggcacgggcagctt,  
taggtcaggggtgtcacgag, tagcggctgaagcactgcac, gtgctgctcatgtggtcgg, gcatggcggactgaagaag,  
cgctcctggacgtagccttc, gtcgtcctgaagaagatgg, tcggcgcgggtctttagtt, ggtgtcgcctcgaactca,  
ttcagctcgatgcggtcac, gtctcctgaagtcgatgc, agcttggtccccaggatgtt, gtggctgtttagttgact,  
ttgtcggccatgatatagac, caccttgatgccgttctct, atgttgtggcggatcttgaa, gagctgcacgctgccgtct,  
tgttctgctgtagtggtcg, agcacggggccgtcggcat, caggtagtggtgtcgggca, ttgctcagggcggactgggt,  
atcgcgcttctcgttgggg, cgaactccagcaggaccatg, agagtatcccggcggcgg, cttgtacagctcgtccatgc

***camk2*:** gaaaaacgcgtacaggtgc, ccaactctctttgatgtcg, tcacaattgagaatgctct, gcagcaattcaaagccagt,  
gtctctggcagttaatfff, cttcacgttccagttttga, tgtaactttctgcagatcct, tgtatactgtcatgtagccg, aaggtagtgatagttctct,  
aatgtgatcatcagcttct, cattttggtggcagtgattg, attctctggttcagatctc, ccttagcctfactagctaat,  
agaccaaagtccagcagttt, ctgatgatcgccttgaactt, gagacagatatcctggtgtg, tagggctccttttcaatac,  
aagaataactccacatgcc, atctcatccaaaagggtg, ttatctgcgagtacagtcg, acggataatcataagctccc,  
tttagcttctggagtaaccg, gatgtttaaagcctcagct, cactgtcgcgttgacaaatc, ttggcgatgcacaacggaag,  
tcttgagacagtctacgggt, cgccaacattgtcgtagta, gttatcacttctgctcga, gttgattctttgacctgtga,  
cgtcttcaagagtagtgcta, ggttctttttatctctt, acgactgtagtactcgcgac, cttatatctcaggctcttt, agttttgcaggacacagta,  
cactgcgagtttctatatt, tttctgtcgtctagctgaa, tgcctcaatcaactgctcag, catcaaagtcgccactgtta,  
caaaggcagttagatgcgga, attccttctacaaggttacc, gctttgcagttttaccaag, cttaccaagtaagtgcaca,  
gtctcataggaatgcaa, tgcttatcaatgtactcgt, gactgatgggtatgtgcatg, cattctgccattgttatcg,

atftggcagatgcactcg, aatcgaatgtagtgctccg.
